# Supplementary material
Source: Springer Nature journal article supplement (https://www.springermedizin.de/resource/supplementary/13027_2007_35_MOESM2_ESM.pdf/25656320)

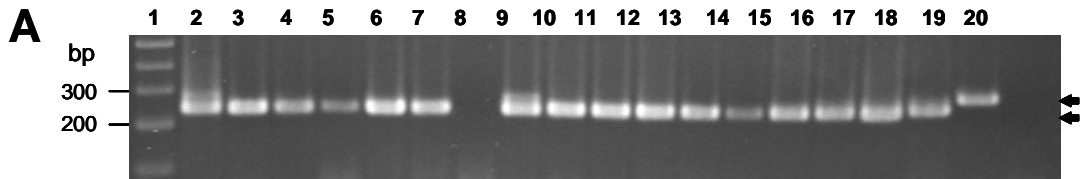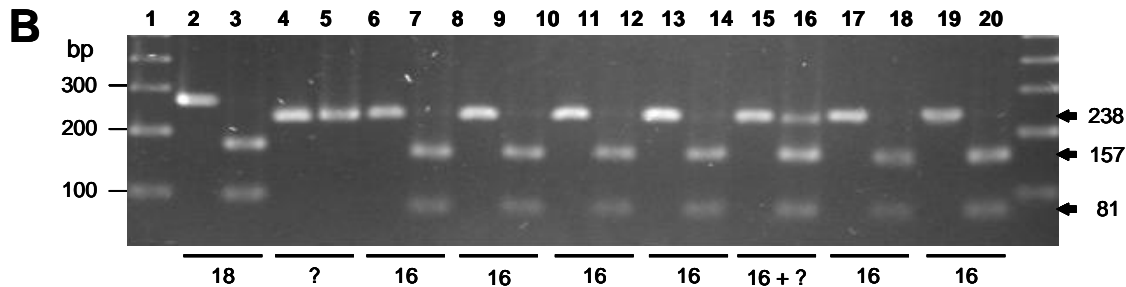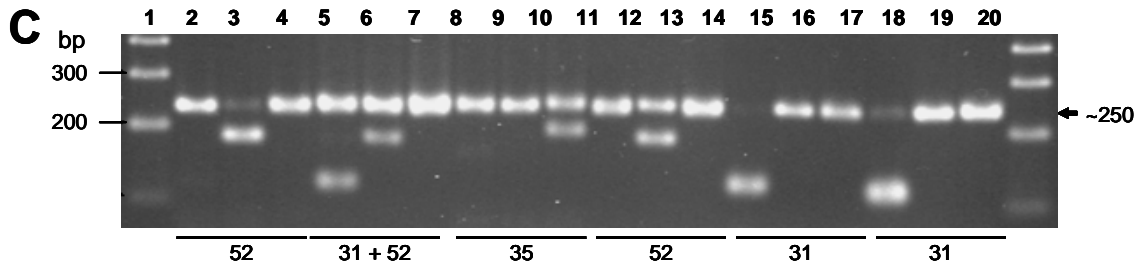

Supplement: MOESM2 [file 25656320]
